# Supplementary material for: 4-Phenylcoumarin (4-PC) Glucoside from Exostema caribaeum as Corrosion Inhibitor in 3% NaCl Saturated with CO2 in AISI 1018 Steel: Experimental and Theoretical Study
Source: MDPI journal article supplement (doi:10.3390/ijms23063130), 2022-03-15
Supplement: s1 [file s1]

## Supplementary material

### $\text{Fe}_6 + 4\text{-PC}$

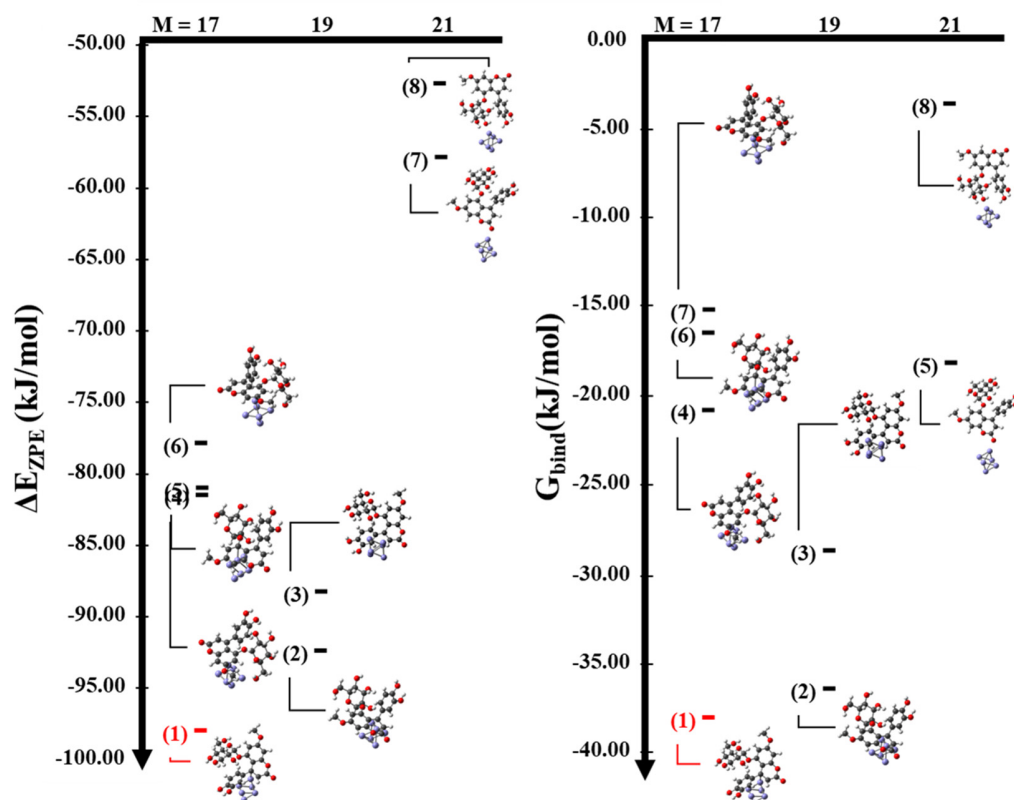

**Figure S1.** Optimized structures of 4-PC corrosion inhibitor molecule interacting with the  $\text{Fe}_6$  cluster at the BPW91-D2/6-311 ++ G (2d,2p) level as function of the ZPE-corrected relative energy  $\Delta E_{\text{ZPE}}$  and  $G_{\text{bind}}$ .
